# Supplementary material
Source: Elsevier journal article supplement (https://www.sciencedirect.com/science/article/pii/S2173574322000466)
Supplement: mmc4 [file S2173574322000466:mmc4.pdf]

## Anexo 4. Resultados de Satisfacción

| Estudio                                     | Método medición utilizado                                                               | Variable medida                                                                                                                                                                                                                                                                                                                                                                                                                                                                                                                                                                                                                                                                                                                                          | Problemas detectados                              |
|---------------------------------------------|-----------------------------------------------------------------------------------------|----------------------------------------------------------------------------------------------------------------------------------------------------------------------------------------------------------------------------------------------------------------------------------------------------------------------------------------------------------------------------------------------------------------------------------------------------------------------------------------------------------------------------------------------------------------------------------------------------------------------------------------------------------------------------------------------------------------------------------------------------------|---------------------------------------------------|
| <b>Arthur 1999</b> <a href="#">[14]</a>     | Encuesta                                                                                | -Satisfacción AI= 94,5%<br>-Ahorro coste-beneficio de la AI= 92,5%<br>-Grado satisfacción<br>-Muy Satisfecho= 80%<br>-Satisfecho= 20%                                                                                                                                                                                                                                                                                                                                                                                                                                                                                                                                                                                                                    | -Dosis incorrecta= 5,0%<br>-Reacción local= 12,5% |
| <b>Burbage 2001</b> <a href="#">[11]</a>    | Escala de satisfacción 1-5                                                              | Puntuación media= 4,2                                                                                                                                                                                                                                                                                                                                                                                                                                                                                                                                                                                                                                                                                                                                    |                                                   |
| <b>Demary 2014</b> <a href="#">[22]</a>     | Cuestionario                                                                            | -Preferencia por la pluma 76% (IC 95% 67-83,8 p<0,001), sin cambios con estratificación, del 90% en pacientes con mucho o muchísimo miedo a las agujas, 82% si se comenzó con la pluma, 67% si se comenzó con la jeringa<br>-Investg y enf= 92% prefirieron la pluma                                                                                                                                                                                                                                                                                                                                                                                                                                                                                     |                                                   |
| <b>Freundlich 2014</b> <a href="#">[23]</a> | Cuestionario                                                                            | -Facilidad de uso AI<br>---Muy de acuerdo/acuerdo<br>-98% → es fácil de usar<br>-100% → entendieron instrucciones escritas<br>-100% → las instrucciones escritas eran claras y fáciles de seguir<br>-100% → entendieron el curso de entrenamiento<br>-100% → el curso de entrenamiento fue claro y fácil de seguir<br>-EVA dolor lugar de inyección día 1 inmediatamente tras AI<br>-0 mm= 34,3%<br>-1mm= 20,2%<br>-EVA dolor lugar de inyección día 2 tras AI<br>-0 mm= 55,2%<br>-1mm= 17,6%<br>-Gravedad del dolor medio en lugar de inyección al día 2 fue 1,4 mm<br>-92,3% no eritema (gravedad 0), 7,7% eritema muy leve, casi imperceptible (gravedad 1), sin induración ni equimosis, no grados 2 o superiores<br>-n=2 equimosis leve sin eritema |                                                   |
| <b>Hattesoehl 2018</b> <a href="#">[72]</a> | -Evaluación escala categórica                                                           | -90% pac puntuaron “muy bien” o “bien” un auto-inyector; con <0,0001 entre primera y segunda visita a las 12s                                                                                                                                                                                                                                                                                                                                                                                                                                                                                                                                                                                                                                            |                                                   |
| <b>Katz 2015</b> <a href="#">[73]</a>       | EVA satisfacción<br>EVA confianza<br>Cuestionario post-educación<br>Tiempo de educación | -Enseñanza estándar vs Enseñanza por video<br>-EVA satisfacción del paciente= 9,9 vs 10<br>-EVA confianza previo a la enseñanza= 5,5 vs 4,7<br>-EVA confianza post-enseñanza= 8,8 vs 8,8<br>-Δ confianza= 3,3 vs 4,4                                                                                                                                                                                                                                                                                                                                                                                                                                                                                                                                     |                                                   |

|                                                |                                                          |                                                                                                                                                                                                                                                                                                                                                                                                                                                                                                                                                                                                                                                                                                                                                                                                                                                                                                                                                                                                                                                                                                                    |
|------------------------------------------------|----------------------------------------------------------|--------------------------------------------------------------------------------------------------------------------------------------------------------------------------------------------------------------------------------------------------------------------------------------------------------------------------------------------------------------------------------------------------------------------------------------------------------------------------------------------------------------------------------------------------------------------------------------------------------------------------------------------------------------------------------------------------------------------------------------------------------------------------------------------------------------------------------------------------------------------------------------------------------------------------------------------------------------------------------------------------------------------------------------------------------------------------------------------------------------------|
|                                                |                                                          | <ul style="list-style-type: none"> <li>-Cuestionario post- educación= 4,7 vs 5,5</li> <li>-Tiempo educación= 60 vs 44 (p=0,012)</li> </ul>                                                                                                                                                                                                                                                                                                                                                                                                                                                                                                                                                                                                                                                                                                                                                                                                                                                                                                                                                                         |
| <b>Moitra 2005</b><br><a href="#">[21]</a>     | Extraído de historia clínica (presencial o por teléfono) | <ul style="list-style-type: none"> <li>-Cambio MTX parent por inef <ul style="list-style-type: none"> <li>-Sentirse mejor 47,7%, igual 47,7%</li> <li>-Mejoría VSG 73%</li> </ul> </li> <li>-Cambio MTX parent por EA <ul style="list-style-type: none"> <li>-Sentirse mejor 74,2%</li> </ul> </li> </ul>                                                                                                                                                                                                                                                                                                                                                                                                                                                                                                                                                                                                                                                                                                                                                                                                          |
| <b>Müller Ladner 2010</b> <a href="#">[19]</a> | Cuestionario + EVA                                       | <ul style="list-style-type: none"> <li>-Preferencias pac jeringa 50 ml vs jeringa 20 ml <ul style="list-style-type: none"> <li>-Preferencia 93% vs 2,3% (p&lt;0,001)</li> <li>-Valoración global jeringa 50 ml buena/muy buena 90,6% vs 1,6% pobre/muy pobre vs valoración global jeringa 20 ml buena/muy buena 34,4% vs 17,2% pobre/muy pobre (p&lt;0,001)</li> <li>-Para enf/med estudio valoración global jeringa 50 ml buena/muy buena 100% vs valoración global jeringa 20 ml buena/muy buena 43,8%</li> </ul> </li> <li>-Uso <ul style="list-style-type: none"> <li>-Aguja pre-puesta en jeringa 50 ml 89,1% es ventaja/gran ventaja para pacientes y para 100% de enf/med del estudio</li> <li>-Vol &lt; de 50 ml mejor que el &gt; vol de 20 ml: 87,5% de acuerdo/muy de acuerdo en pac e investg</li> </ul> </li> </ul>                                                                                                                                                                                                                                                                                   |
| <b>Pachon 2013</b><br><a href="#">[74]</a>     | -Cuestionario preparado para la ocasión                  | <ul style="list-style-type: none"> <li>-98,1% de los pac alcanzaron un <math>\geq 80\%</math> en el examen</li> <li>-En la valoración subjetiva, los pac consideraban el dispositivo fácil de usar ,y su experiencia fue satisfactoria</li> </ul>                                                                                                                                                                                                                                                                                                                                                                                                                                                                                                                                                                                                                                                                                                                                                                                                                                                                  |
| <b>Rawat 2016</b><br><a href="#">[75]</a>      | Cuestionario                                             | <ul style="list-style-type: none"> <li>-El apoyo familiar fue el que consiguió mejores resultados para el aprendizaje de la técnica de administración de la inyección ( p=0.00001)</li> </ul>                                                                                                                                                                                                                                                                                                                                                                                                                                                                                                                                                                                                                                                                                                                                                                                                                                                                                                                      |
| <b>Striesow 2012</b><br><a href="#">[20]</a>   | Cuestionario                                             | <ul style="list-style-type: none"> <li>Valoración global muy buena/buena MTX 50ml AI vs mala <ul style="list-style-type: none"> <li>-Pac: 87,6% vs 2,7%</li> <li>-Med/enf: 92,8% vs 1,2%</li> </ul> </li> <li>-Valoración acceso y uso de aguja prepuesta gran ventaja/ventaja 91,8% pacientes y med/enf</li> <li>-Tolerabilidad: 96% pac inyec tolerables/confortables, n=7 solo en una inyec</li> <li>-Variables del paciente: <ul style="list-style-type: none"> <li>-5% errores en sitio administración y desinfección</li> <li>-89,6% bueno/muy buena la etiqueta con la dosis</li> <li>-89,1% considera que la AI les proporciona independencia</li> <li>-83,6% considera que la AI mejora su calidad de vida</li> <li>-94,5% pacientes AI dosis medias previas, prefieren formulación 50 ml (93,6% por menor volumen, 91,8% por aguja prepuesta)</li> </ul> </li> <li>-Variables del médico/enfermera: <ul style="list-style-type: none"> <li>-Las expectativas del beneficio cambio a AI se cumplieron en 92,8% pacientes</li> <li>-96,3% pacientes considerados como aptos para AI</li> </ul> </li> </ul> |

Abreviaturas: AI= autoinyección; investg=investigadores; enf= enfermeras; EA= eventos adversos; paciente=pac; med= médicos; vol= volumen; inyec= inyección
